# Supplementary material for: Plasmonic nanodendrites stabilized with autologous serum proteins for sustainable host specific photothermal tumor ablation
Source: Royal Society of Chemistry journal article supplement (doi:10.1039/d3ma00576c), 2023-01-01
Supplement: d3ma00576c1.pdf [file d3ma00576c1.pdf]

## Supplementary Information

### **Plasmonic nanodendrites stabilized with autologous serum proteins for sustainable host specific photothermal tumor ablation**

Mimansa, Smriti Bansal, Pranjali Yadav, Asifkhan Shanavas\*

<sup>1</sup>Inorganic & Organic Nanomedicine (ION) Lab, Chemical Biology Unit, Institute of Nano Science and Technology, Sector-81, Knowledge City, Sahibzada Ajit Singh Nagar, Punjab 140306, India.

\*Corresponding author: [asifkhan@inst.ac.in](mailto:asifkhan@inst.ac.in)

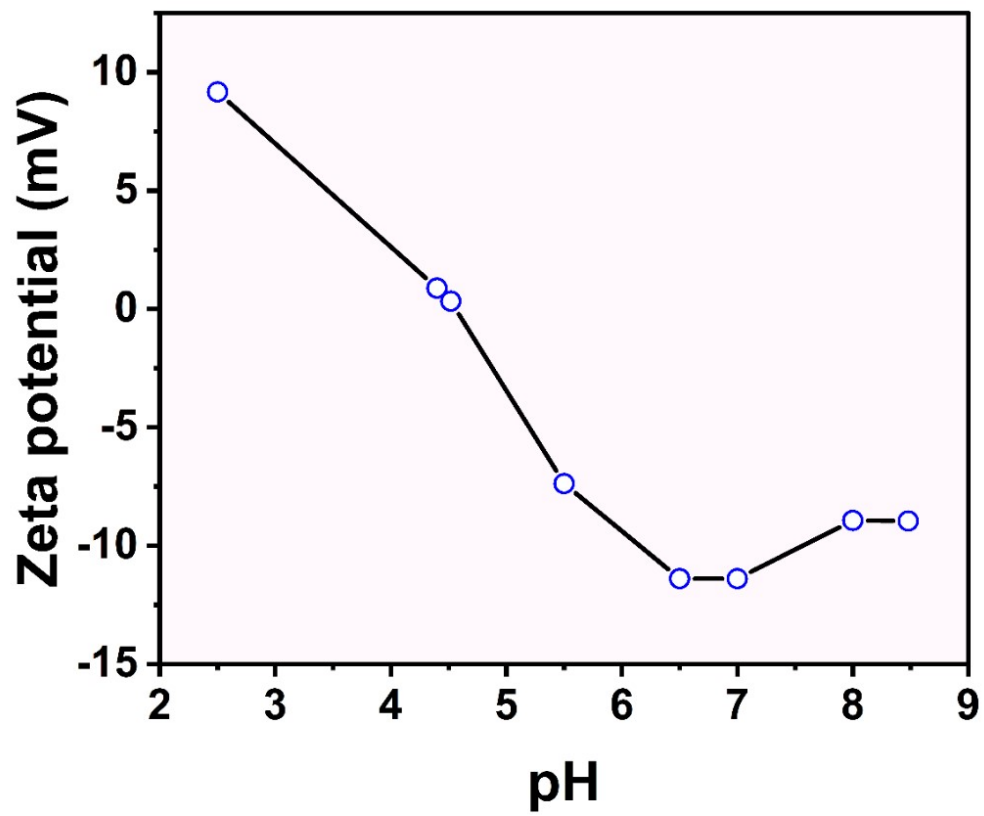

**Figure 1** | pH-dependent cumulative zeta potential of fetal bovine serum proteins.

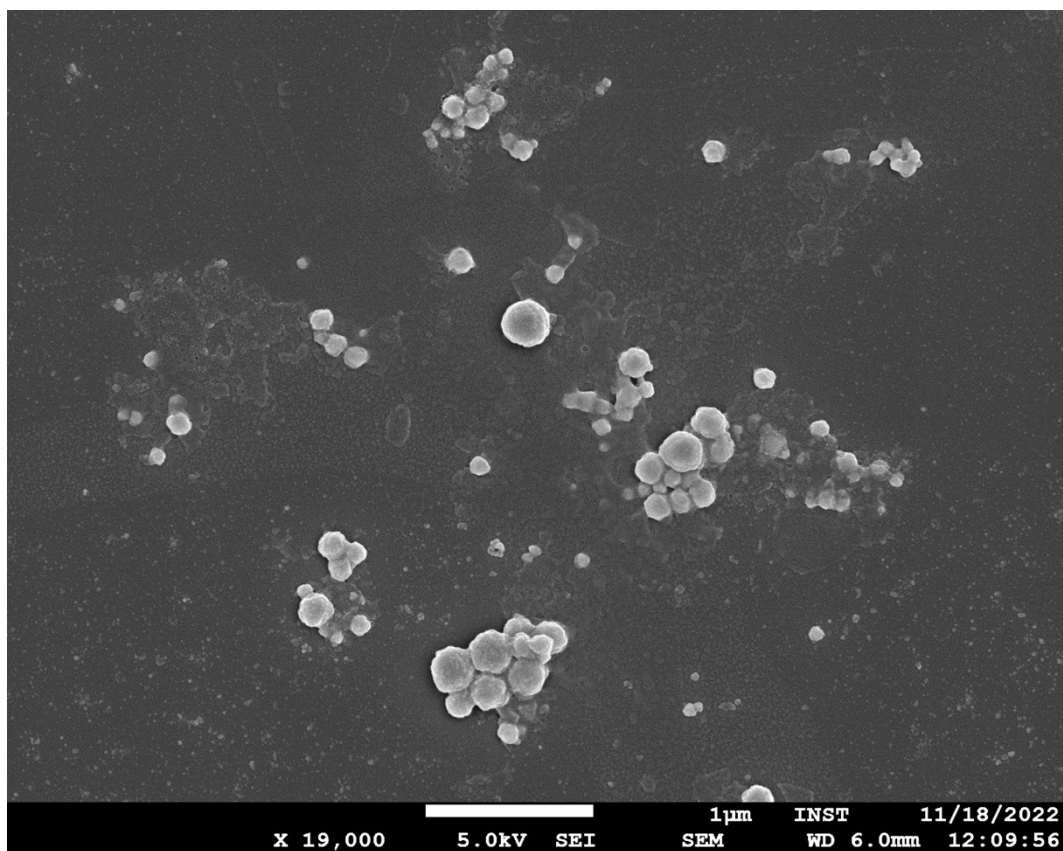

**Figure 2** | FESEM of Plasmonic-NanoSera in the absence of NaOH addition.

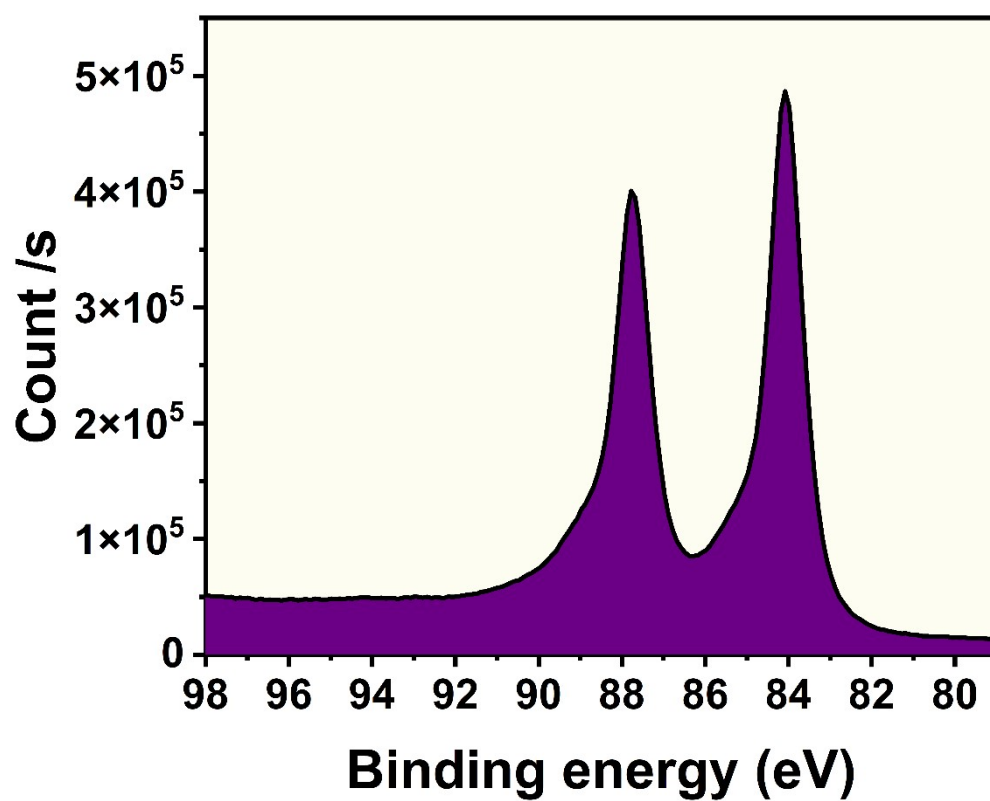

**Figure 3** | XPS spectra of Plasmonic-NanoSera (FBS).

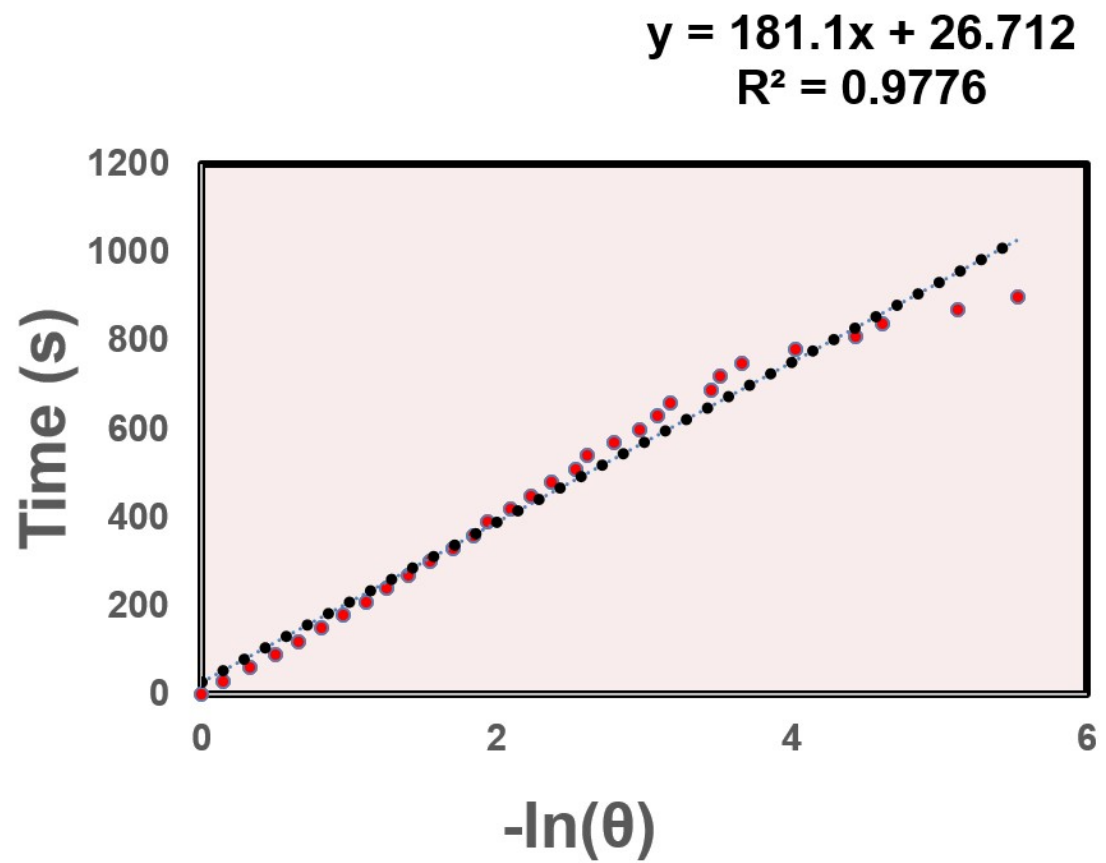

**Figure 4** | Linear time versus  $-\ln(\theta)$  plotted from the cooling period (930 s) of PNS irradiated with 808 nm Laser.

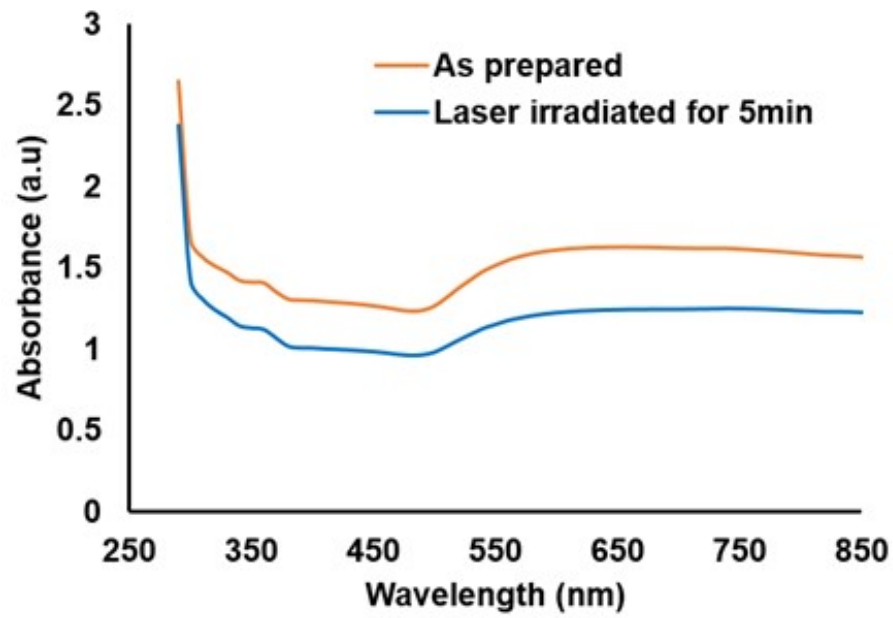

**Figure 5** | UV-Vis-NIR extinction spectra of PNS as prepared and 5 minutes after Laser irradiation.

a)

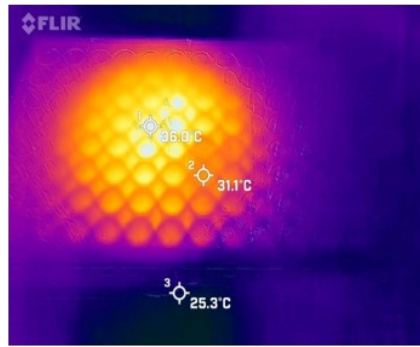

b)

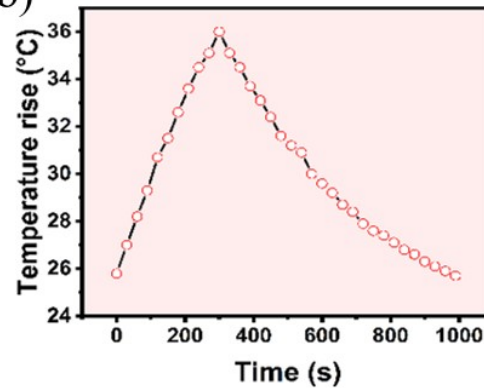

c)

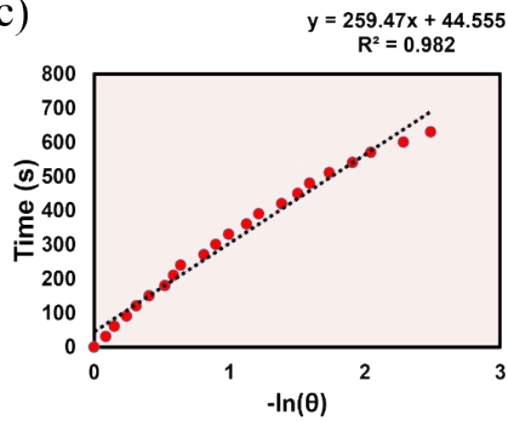

**Figure 6** | a) Photothermal rise of PNS-FBS on Xenon lamp exposure (450 W) after 5 min b) Heating (300 s) and cooling cycle (700 s) c) Linear time versus  $-\ln(\theta)$  plotted from the cooling period (700 s) of PNS irradiated with Xenon lamp.

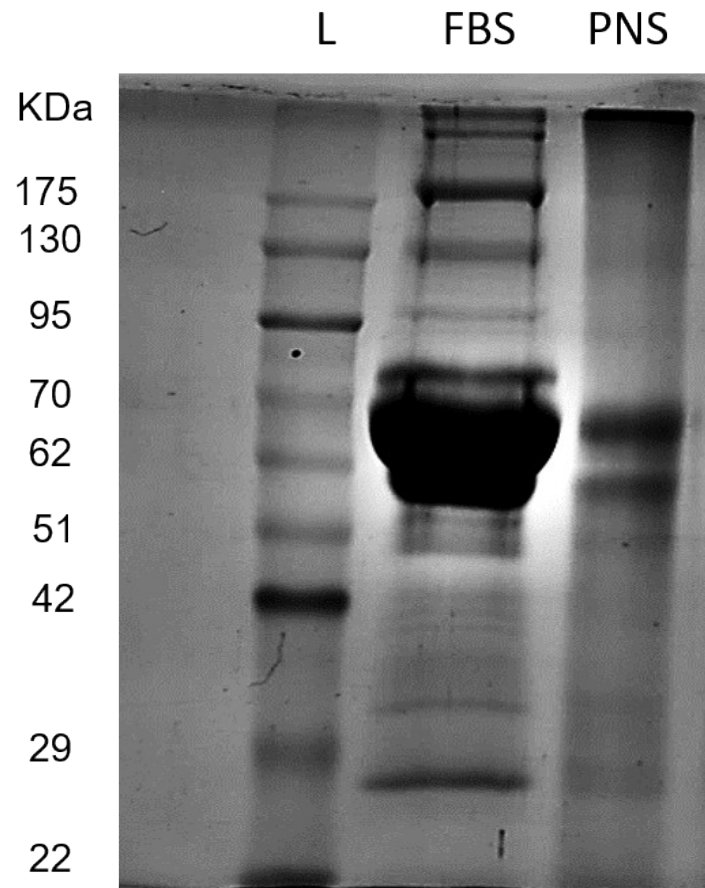

**Figure 7** | SDS-PAGE analysis of proteins extracted from Plasmonic-NanoSera (L-Ladder, FBS-Fetal Bovine Serum, PNS-Plasmonic NanoSera synthesized from FBS).



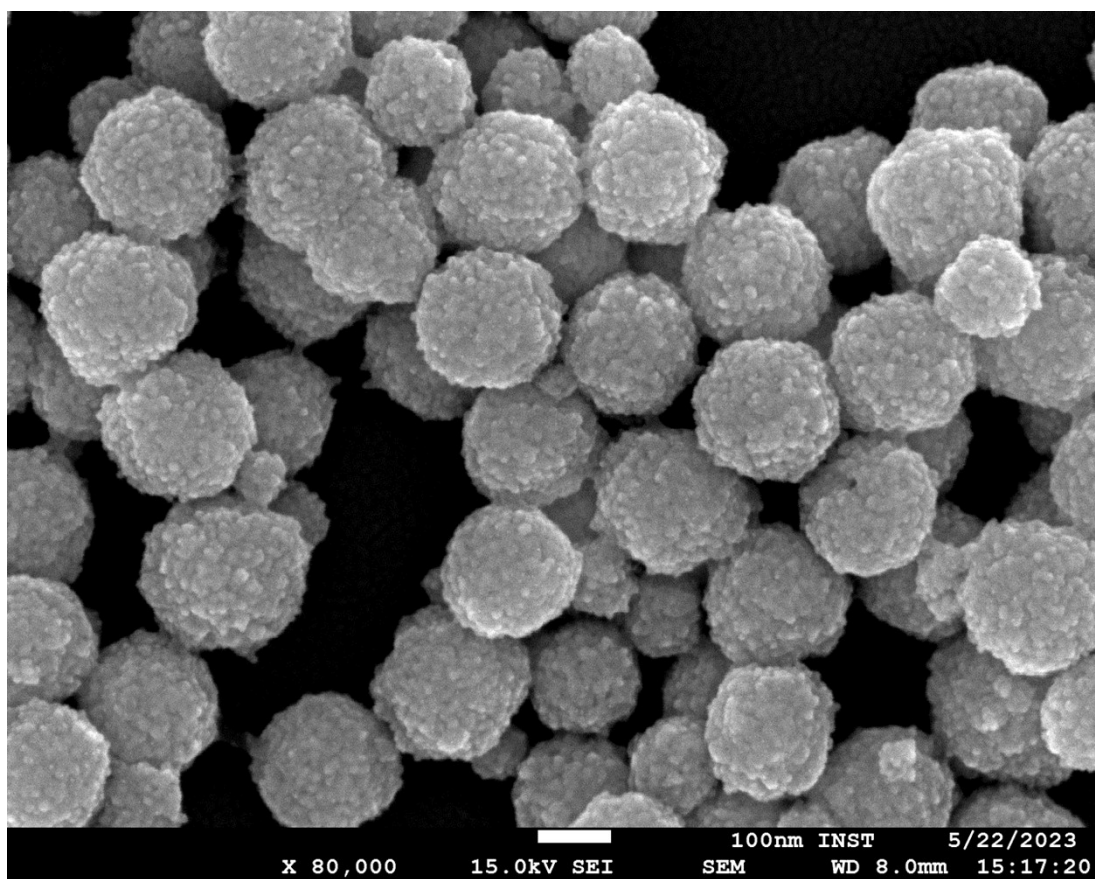

**Figure 8** | FE-SEM image of albumin derived nanodendrites

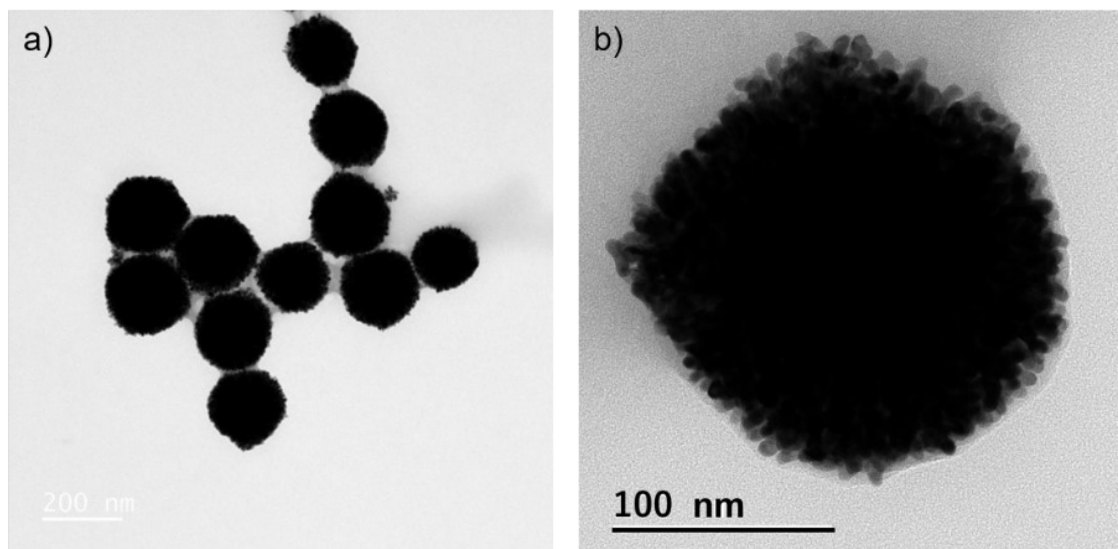

**Figure 9** | TEM images of albumin derived nanodendrites

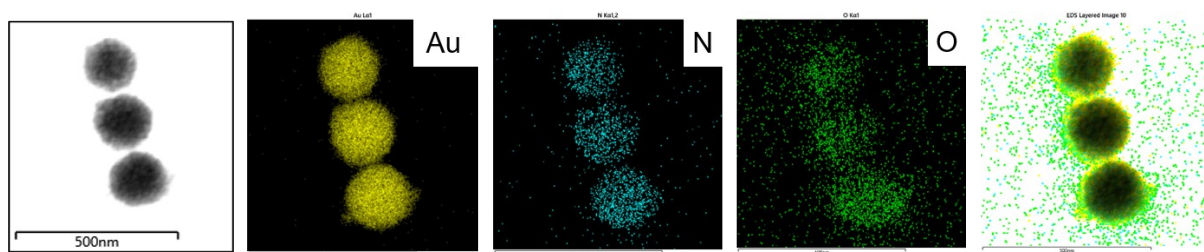

**Figure 10** | Elemental mapping of albumin derived nanodendrites

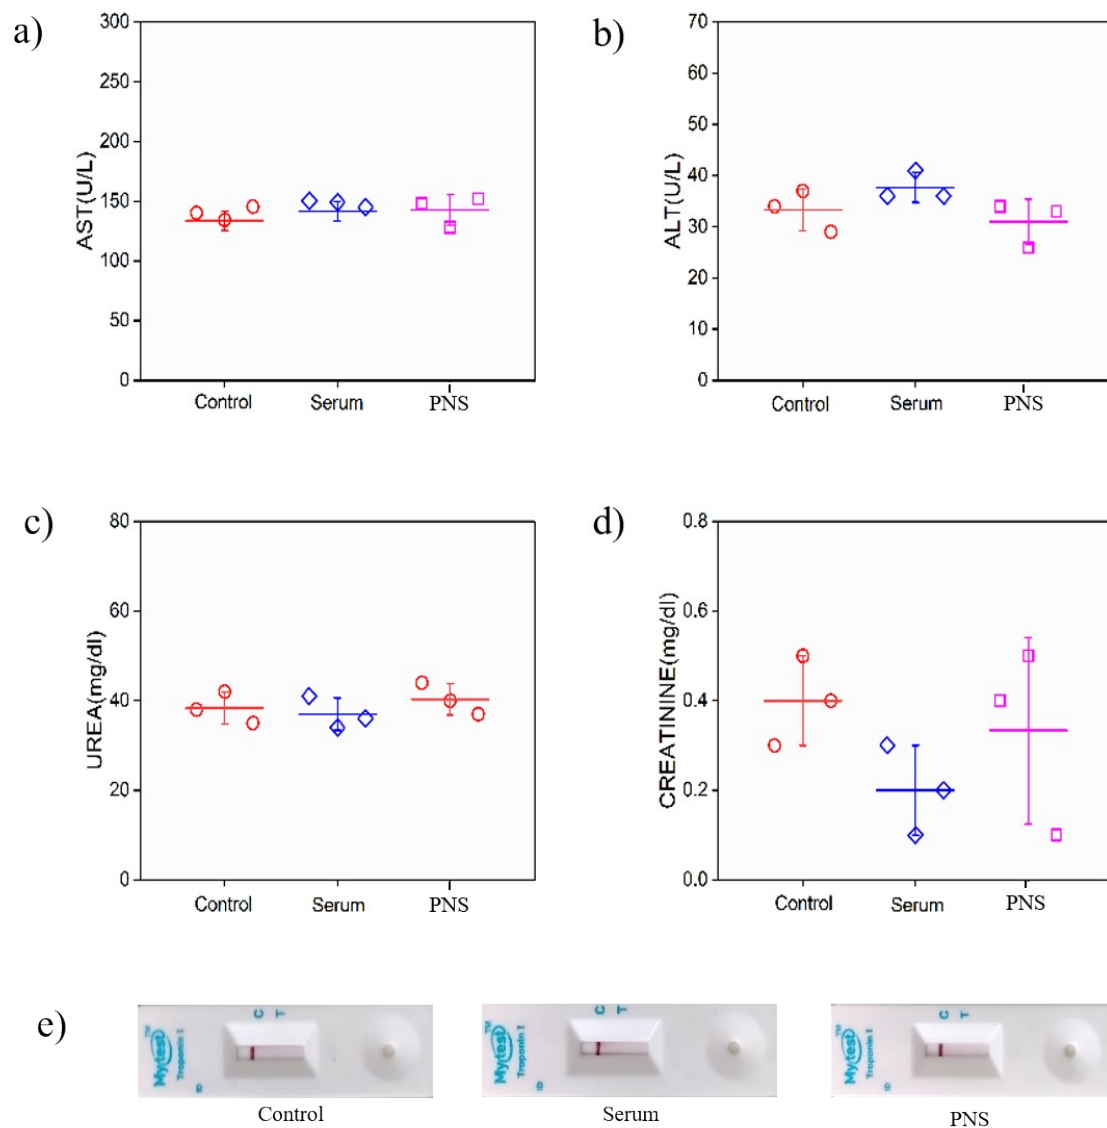

**Figure 11** | Toxicity analysis 24hour post injection of saline or untreated autologous serum or PNS-MS. a) AST; Aspartate aminotransferase b) ALT; Alanine aminotransferase c) Urea d) Creatinine and e) Troponin I (<0.5ngmL - 1 band; >0.5ngmL - 2 bands)

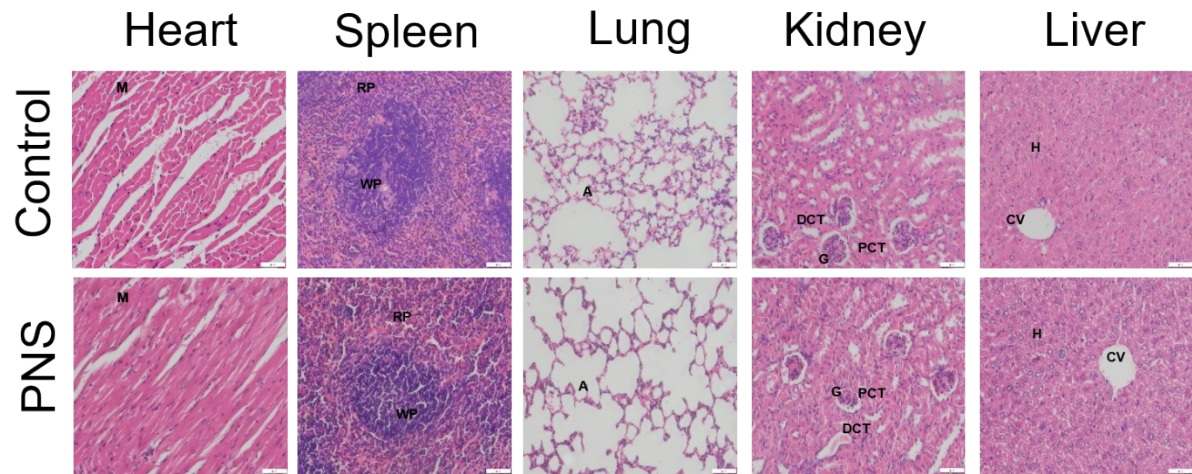

**Figure 12** | Histopathological analysis post day 1 of injection of five major organs in control and PNS-MS groups (M-Myocardium, RP-Right pulp, WP-White pulp, A-Alveoli, G-Glomerulus, DCT-Distal convoluted tubule, PCT-Proximal convoluted tubule, CV-Central vein and H-Hepatocytes)

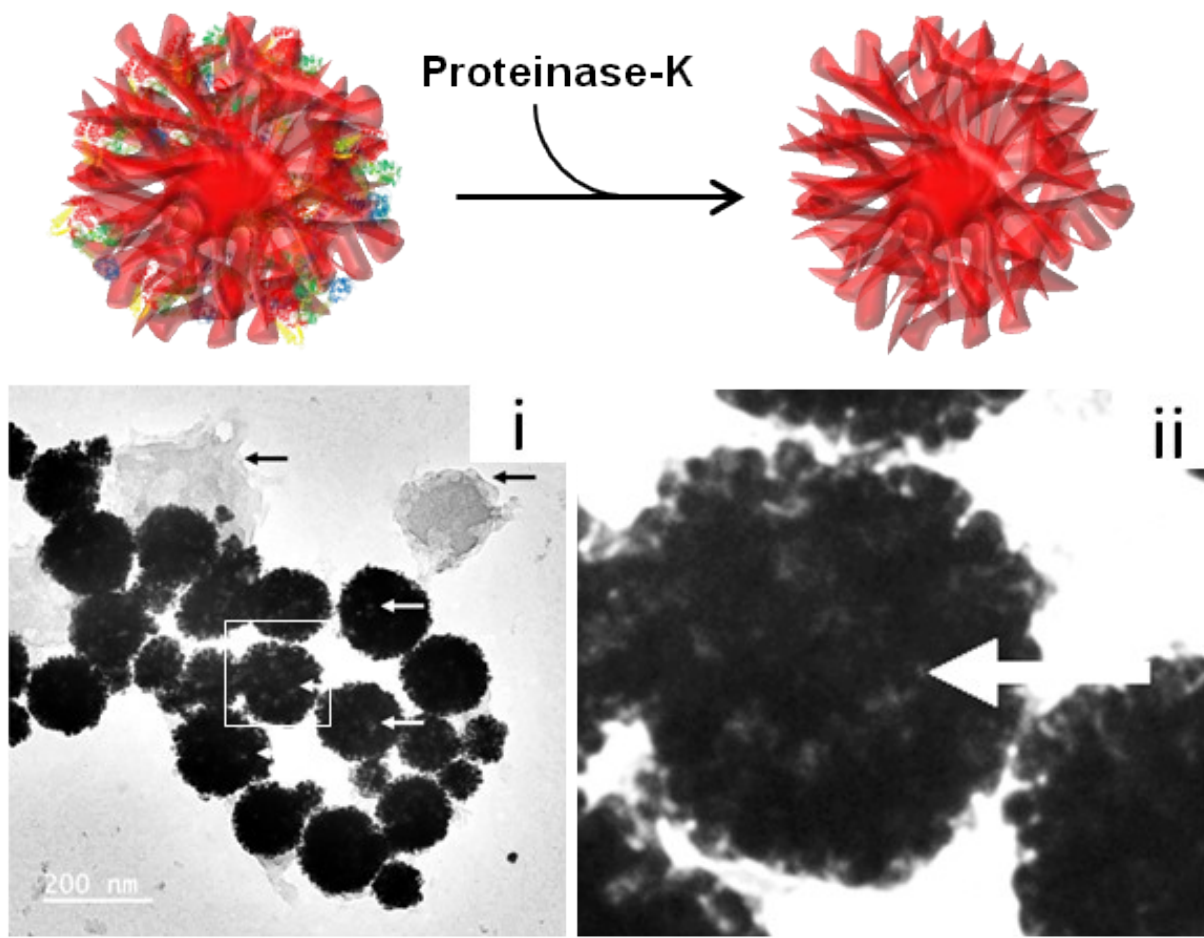

**Figure 13** | Plasmonic-NanoSera treated with Proteinase K (White arrow indicated porosity, Black arrow indicates protein structures)
